# Supplementary material for: Groundwater should be considered in crop risk assessments
Source: Research Square preprint supplement (doi:10.21203/rs.3.rs-7911534/v1), 2025-11-13
Supplement: Supplementary file 1 [file d020ebaf51294a671c82c49d.docx]

Groundwater should be considered in crop risk assessments

Supplementary information

Yean-Uk Kim1,2,3, Lutz Breuer4,5, Jannis Groh6,7,8, Christoph Merz9, Jörg Steidl9, Heidi Webber3,10

1Department of Landscape Architecture and Rural Systems Engineering, Seoul National University, Seoul, Republic of Korea. 2Research Institute of Agriculture and Life Sciences, Seoul National University, Seoul, Republic of Korea. 3Research Area 3 “Agricultural Landscape Systems”, Working Group “Integrated Crop System Analysis and Modelling”, Leibniz Centre for Agricultural Landscape Research (ZALF), Müncheberg, Germany. 4Institute for Landscape Ecology and Resources Management (ILR), Research Centre for Biosystems, Land Use and Nutrition (iFZ), Justus Liebig University Giessen, Giessen, Germany. 5Centre for International Development and Environmental Research (ZEU), Justus Liebig University Giessen, Giessen, Germany. 6Institute of Bio- and Geoscience IBG-3: Agrosphere, Forschungszentrum Jülich GmbH, Jülich, Germany. 7Department of Soil Science and Soil Ecology, University of Bonn, Institute of Crop Science and Resource Conservation, Bonn, Germany. 8Research Area 1 “Landscape Functioning”, Working Group “Isotope Biogeochemistry and Gas Fluxes”, Leibniz Centre for Agricultural Landscape Research (ZALF), Müncheberg, Germany. 9Research Area 2 "Land Use and Governance", Working Group “Lowland Hydrology and Water Management”, Leibniz Centre for Agricultural Landscape Research (ZALF), Müncheberg, Germany. 10Institute of Environmental Sciences, Brandenburg University of Technology, Cottbus, Germany.


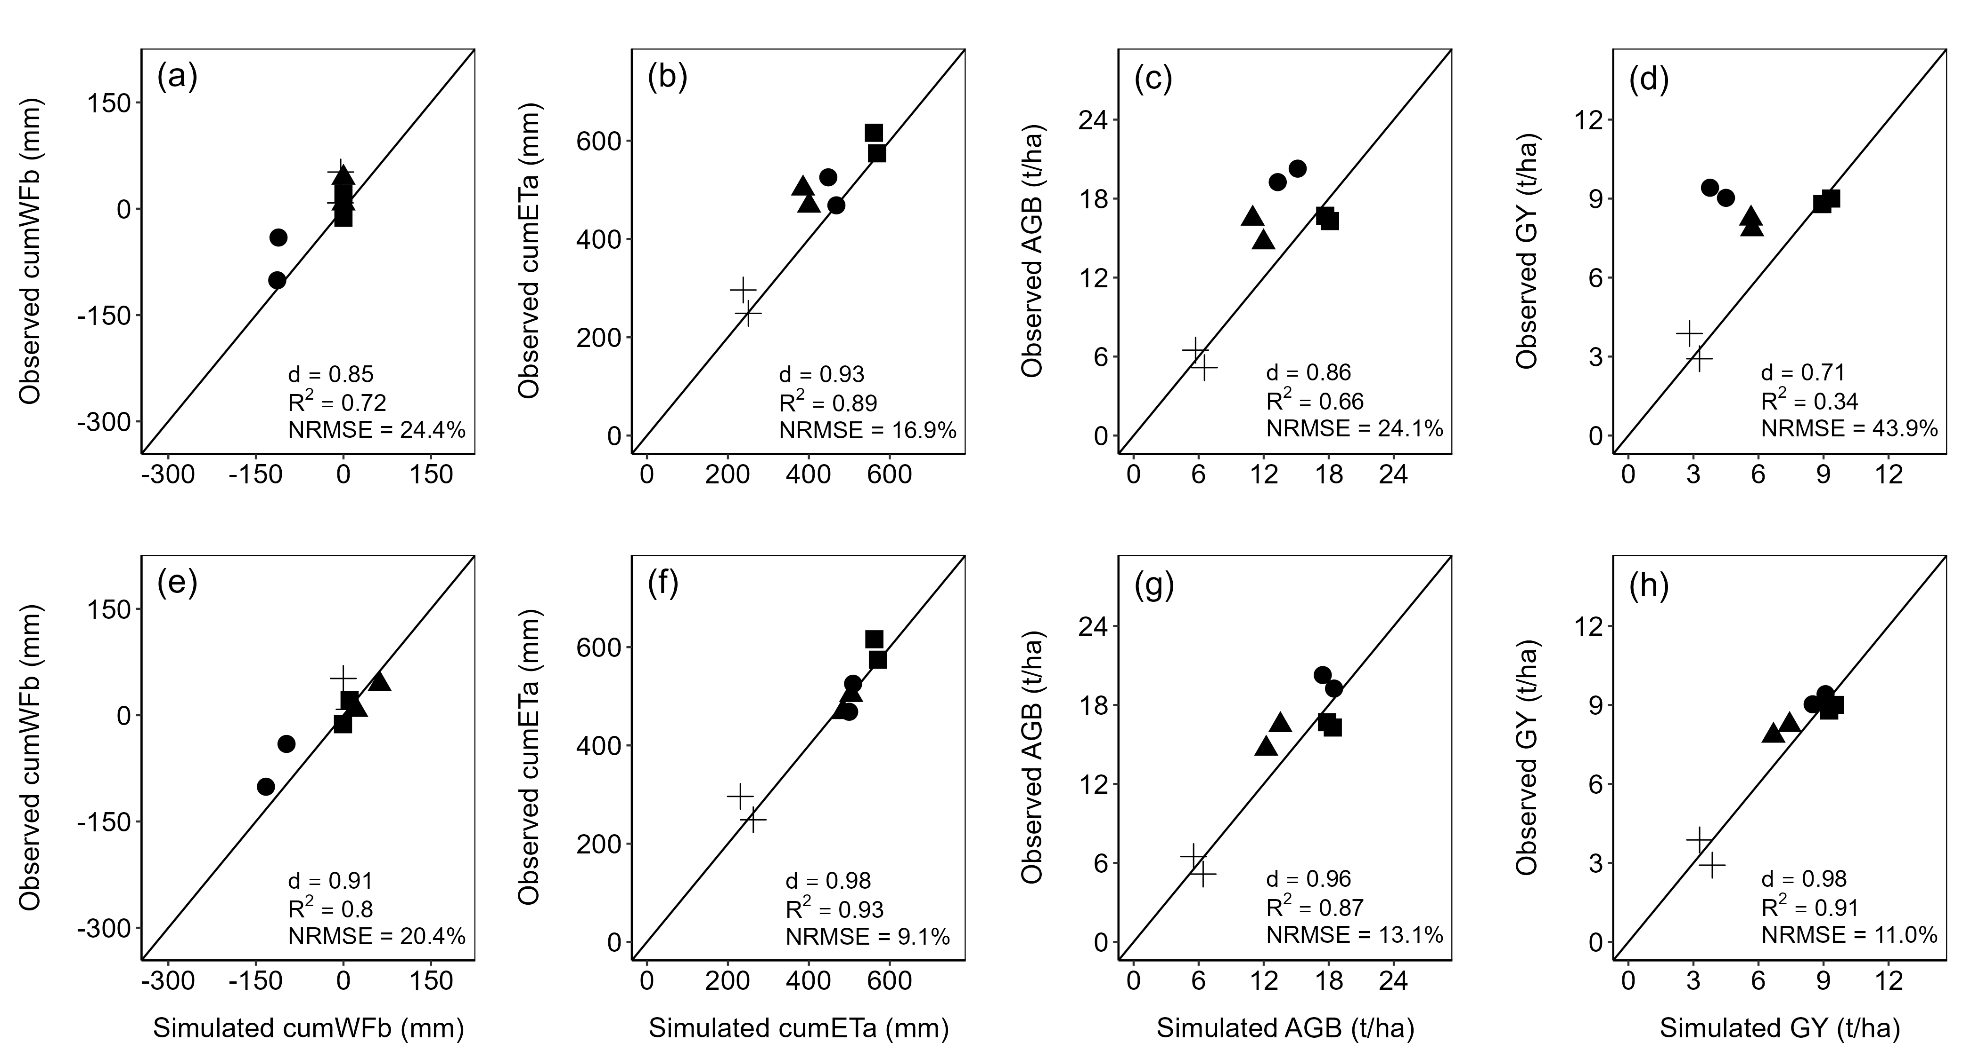


**Fig. S1.** Evaluation of the default (a–d) and improved (e–h) crop models using lysimeter data for cumulative net water flux at the bottom of lysimeter (cumWFb; a, e), cumulative actual evapotranspiration (cumETa; b, f), aboveground biomass (AGB; c, g), and grain yield (GY; d, h). Circles indicate first-year winter wheat, triangles indicate second-year winter wheat, squares indicate third-year winter rye, and crosses indicate fourth-year spring oats. For the bottom water flux, negative values represent deep percolation, while positive values represent capillary rise. d, R2, and NRMSE denote Willmott index of agreement, coefficient of determination, and normalized root mean square error, respectively.


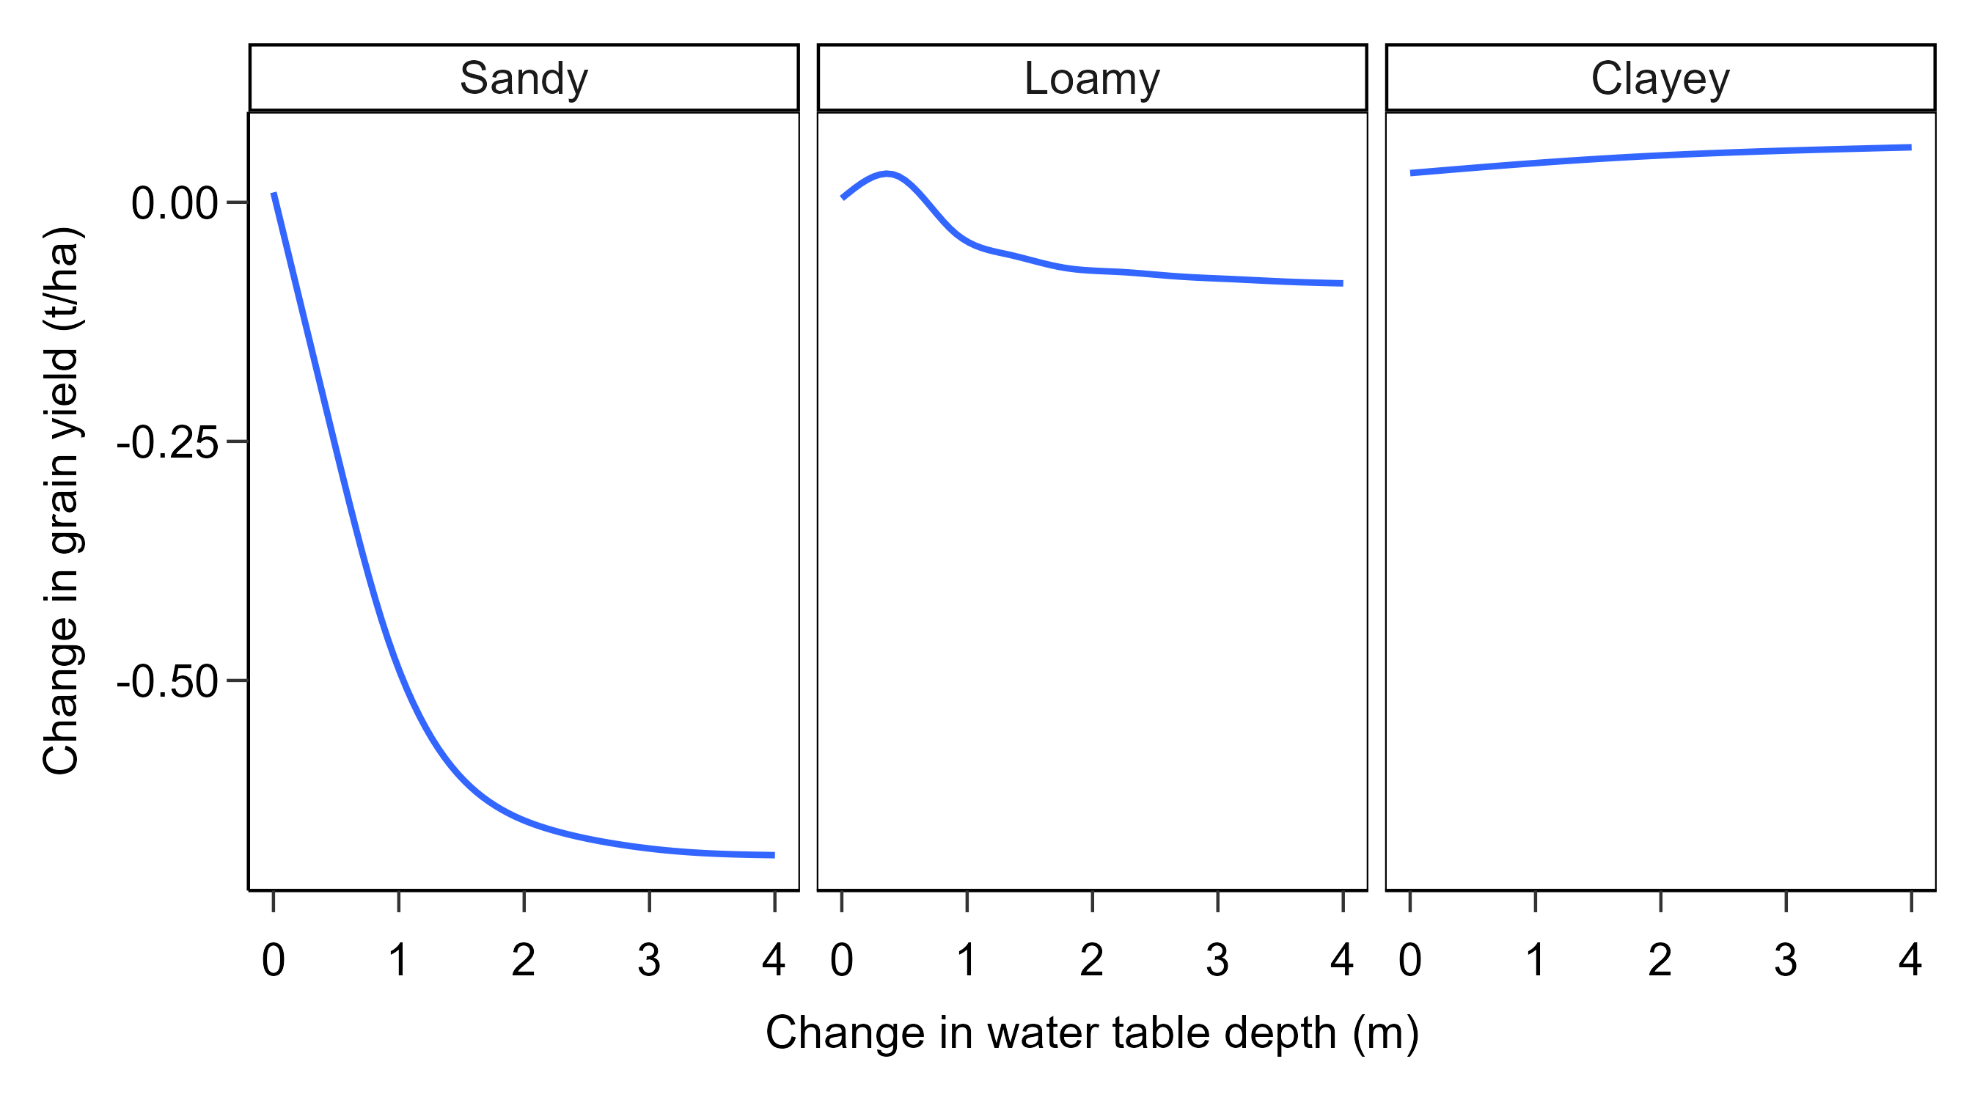


**Fig. S2.** Impact of water table decline on winter wheat yield across different soil textures. Twelve USDA soil texture classes were grouped into sandy (sand and loamy sand), loamy (sandy loam, loam, silt loam, silt, sandy clay loam, clay loam, and silty clay loam), and clayey soils (sandy clay, silty clay, and clay). Lines are drawn using generalized additive models.
